# Supplementary material for: Encapsulation of Co nanoparticles with single-atomic Co sites into nitrogen-doped carbon for electrosynthesis of hydrogen peroxide
Source: Royal Society of Chemistry journal article supplement (doi:10.1039/d3cp05492f), 2023-12-19
Supplement: d3cp05492f1.pdf [file d3cp05492f1.pdf]

## Electronic supplementary information

### Encapsulation of Co nanoparticles with single-atomic Co sites into nitrogen-doped carbon for electrosynthesis of hydrogen peroxide

Kun Li,<sup>a</sup> Yanyan Sun,<sup>a\*</sup> Ziwei Zhao,<sup>b</sup> and Ting Zhu<sup>bc\*</sup>

<sup>a</sup> School of Materials Science and Engineering, Central South University, 932 Lushan Road South, Changsha 410083, Hunan, China.

<sup>b</sup> School of Physics and Electronic Information, Yunnan Normal University, 768 Juxian Street, Kunming 650500, Yunnan, China.

<sup>c</sup> Yunnan Key Laboratory of Optoelectronic Information Technology, Yunnan Normal University, Kunming 650500, Yunnan, China.

\*Correspondence: yanyan.sun@csu.edu.cn ([Y. Y. Sun](mailto:yanyan.sun@csu.edu.cn)); zhut0002@ynnu.edu.cn ([T. Zhu](mailto:zhut0002@ynnu.edu.cn))

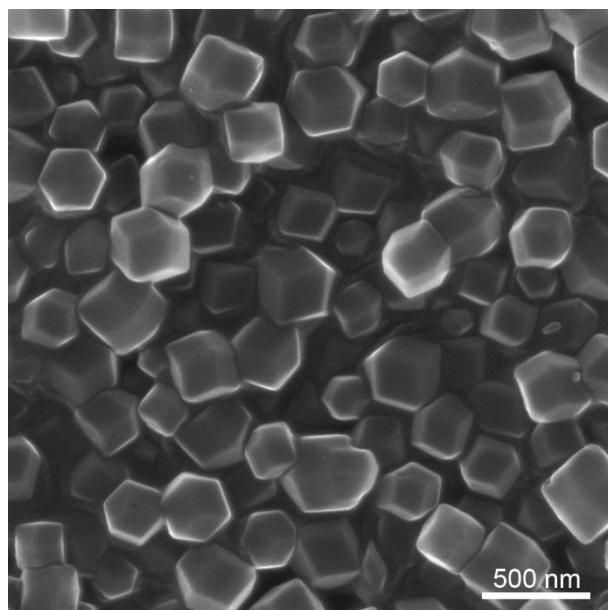

**Fig. S1.** SEM image of the resultant ZIF-67.

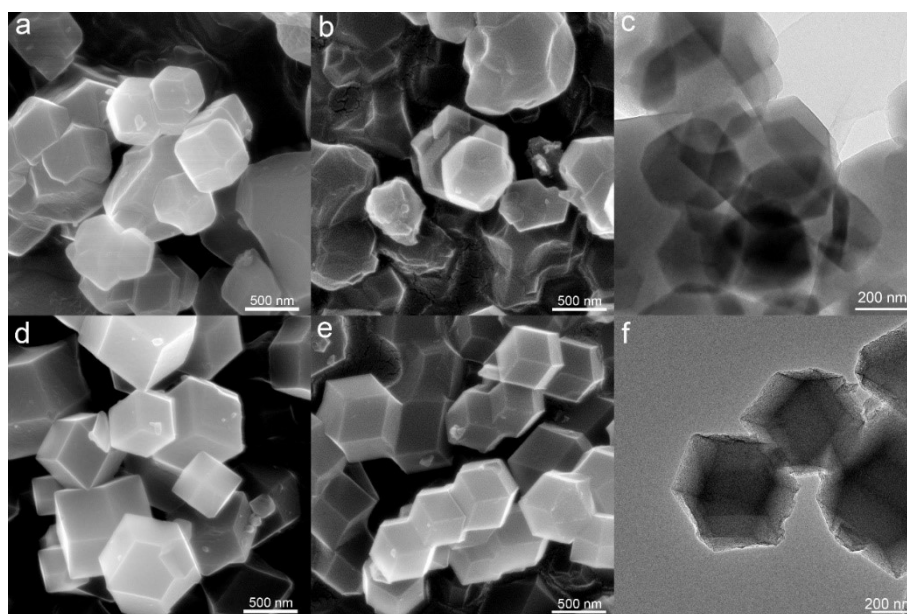

**Fig. S2.** (a, b, d, e) SEM images, (c, f) TEM images of the resultant ZIF-8 (a), NC-900 (b-c), Co/Zn-ZIF (d), and Co SACs-900 (e-f).

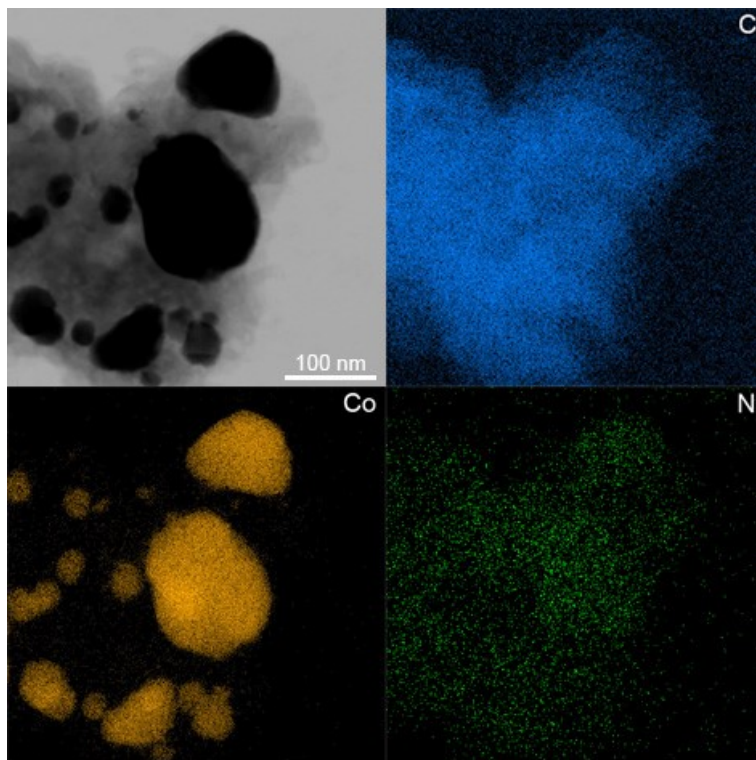

**Fig. S3.** EDX mappings of the resultant CoNC-900.

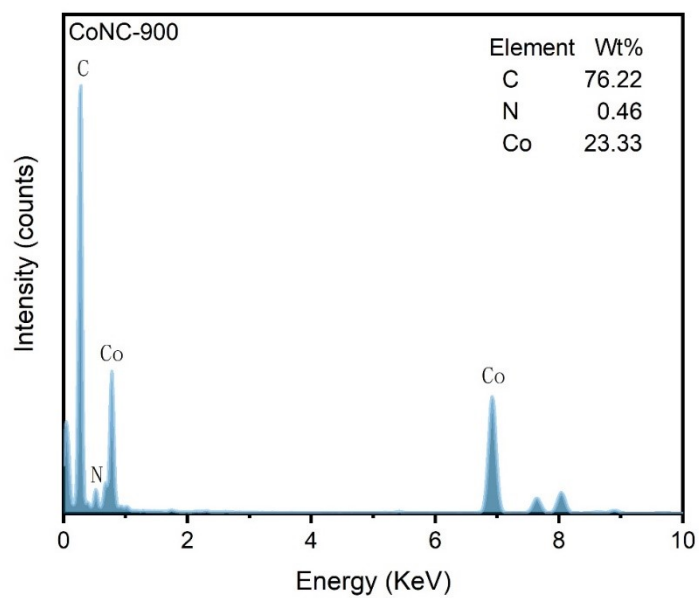

**Fig. S4.** The corresponding EDS spectrum of CoNC-900.

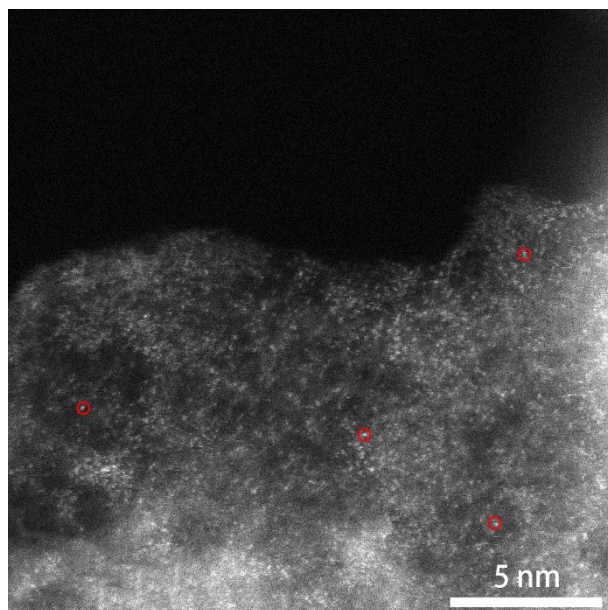

**Fig. S5.** AC HAADF-STEM images of the resultant Co SACs-900.

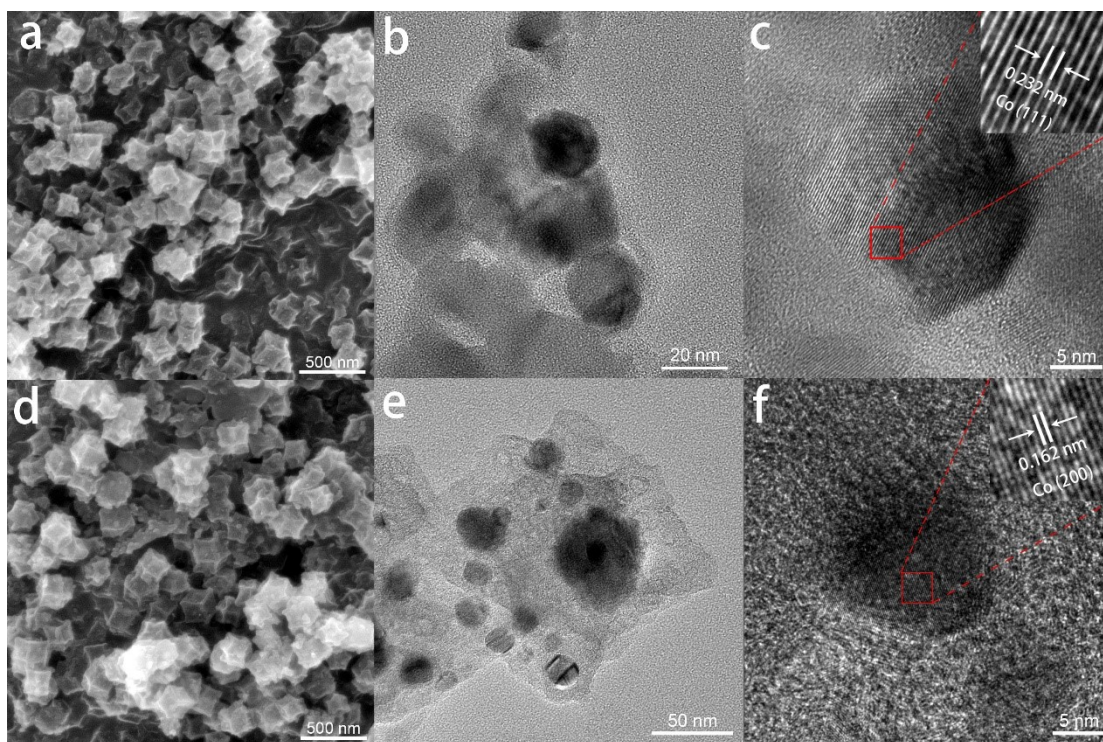

**Fig. S6.** (a, d) SEM, (b, e) TEM, (c, f) HRTEM images of the resultant CoNC-700 (a-c) and CoNC-800 (d-f).

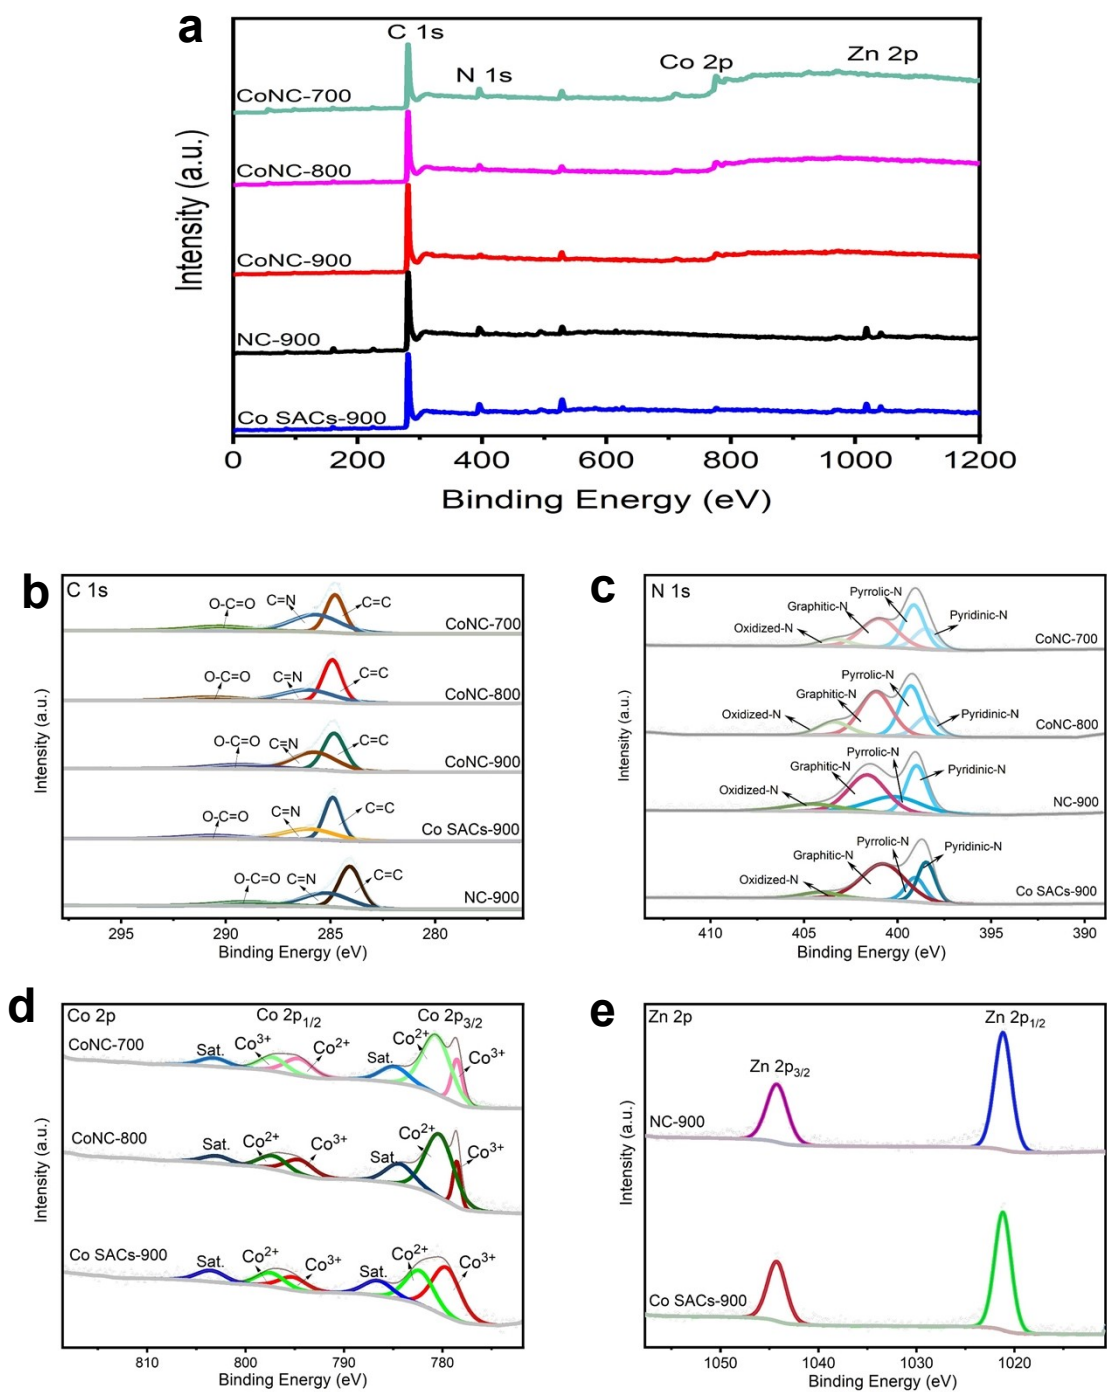

**Fig. S7.** (a) The survey XPS spectrum, (b) high resolution C 1s XPS spectra, (c) high resolution N 1s XPS spectra, (d) high resolution Co 2p XPS spectra, and (e) high resolution Zn 2p XPS spectra of the resultant catalysts.

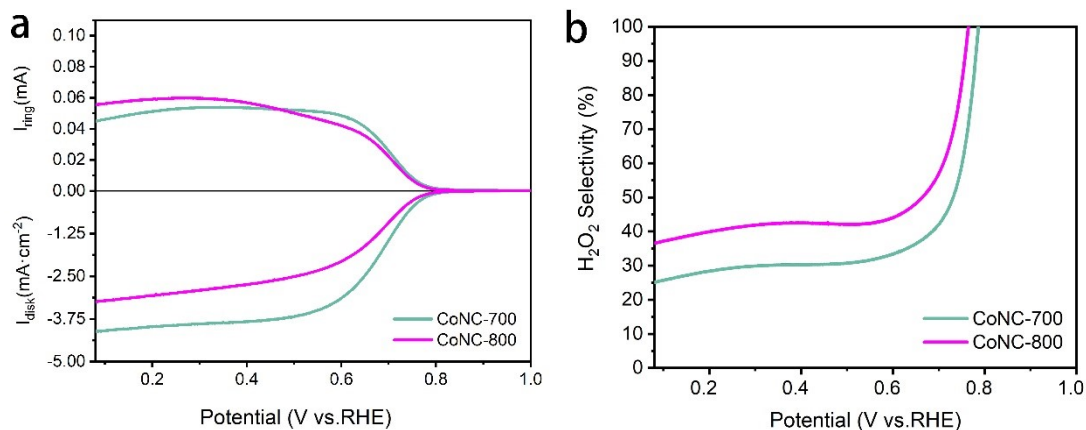

**Fig. S8.** (a) LSV curves and (b) H<sub>2</sub>O<sub>2</sub> selectivity of CoNC-700, CoNC-800 in 0.5 M H<sub>2</sub>SO<sub>4</sub>.

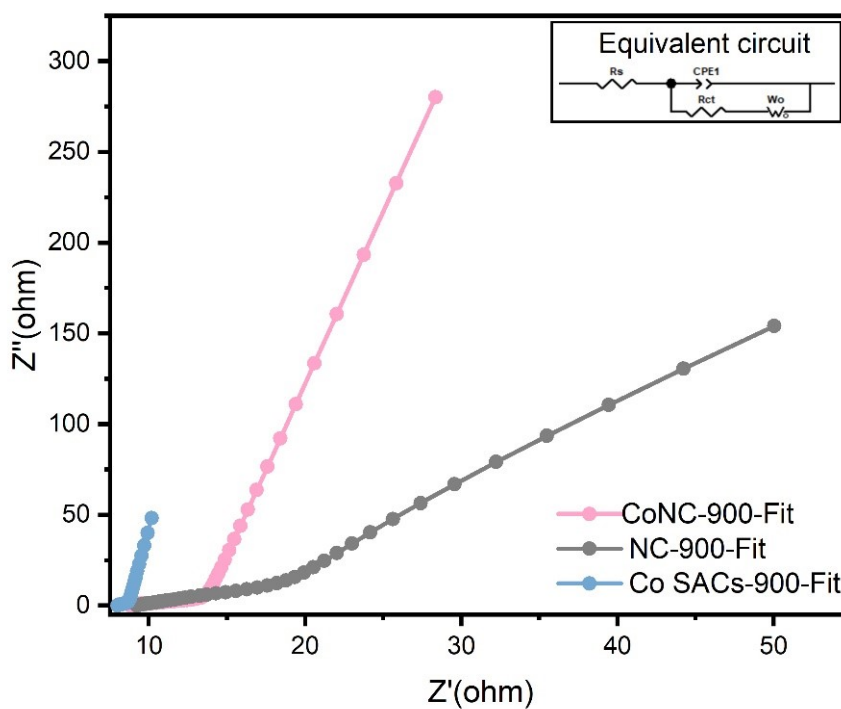

**Fig. S9.** The EIS fit results' curves for CoNC-900, NC-900, and Co SACs-900. Note:  $R_s$ : Solution resistance;  $CPE1$ : Constant phase element;  $R_{ct}$ : Charge transfer resistance;  $W_o$ : Warburg element (open).

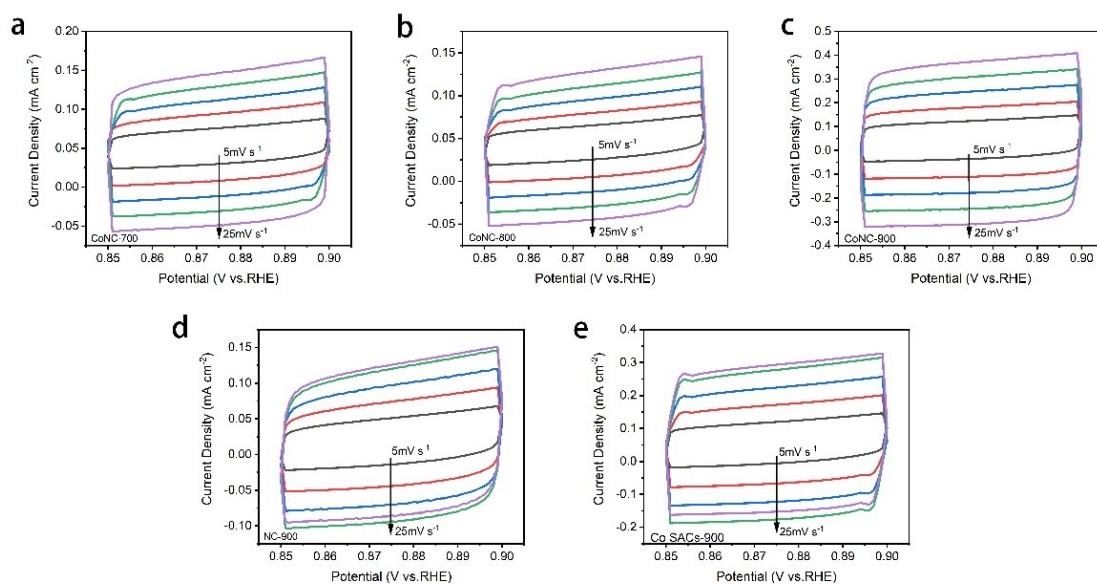

**Fig. S10** CV curves at different scan rates of 5, 10, 15, 20 and 25  $\text{mV s}^{-1}$  over the resultant (a) CoNC-700, (b) CoNC-800, (c) CoNC-900, (d) NC-900, and (e) Co SACs-900 in 0.5 M  $\text{H}_2\text{SO}_4$ .

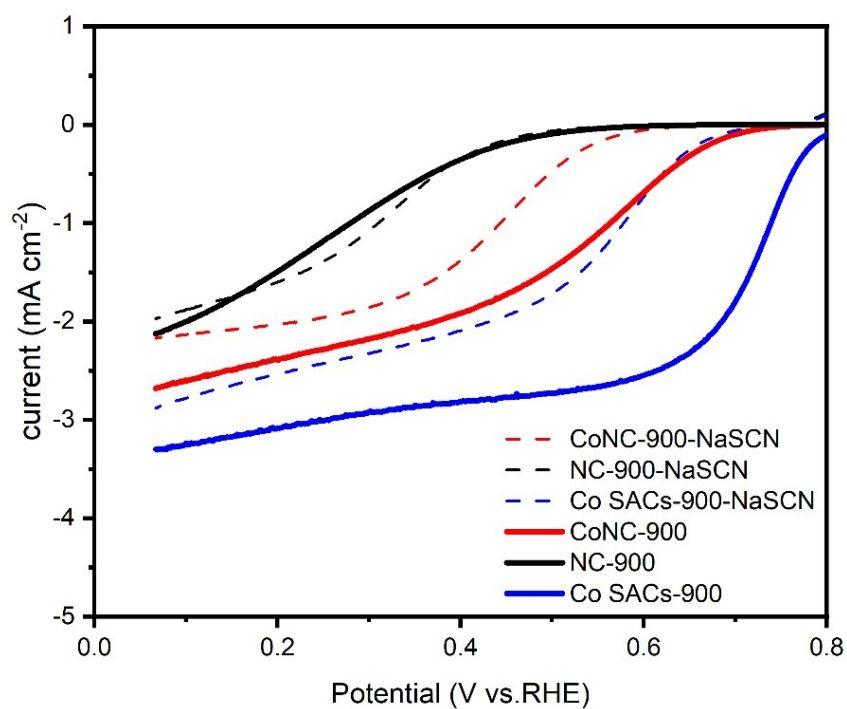

**Fig. S11** LSV curves as a function of scan rates for CoNC-900, NC-900, and Co SACs-900 in 0.5 M  $\text{H}_2\text{SO}_4$  with and without 10mM NaSCN.

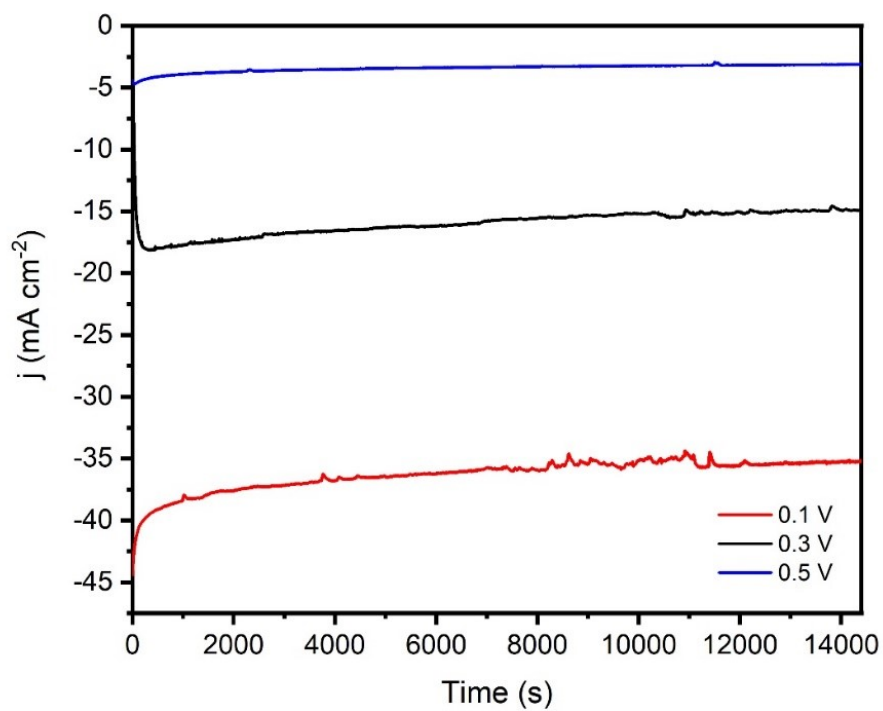

**Fig. S12** Chronoamperometry curves of CoNC-900/CP were obtained at 0.1 V, 0.3 V, and 0.5 V for 4 hours at each potential in 0.5 M H<sub>2</sub>SO<sub>4</sub>.

**Table S1** Peak fitting data of Raman spectra for the resultant catalysts.

| Catalyst | Band | Peak Area | Center | Maximum Intensity | FWHM |
|----------|------|-----------|--------|-------------------|------|
|----------|------|-----------|--------|-------------------|------|



|             |   |           |         |        |        |
|-------------|---|-----------|---------|--------|--------|
| CoNC-900    | D | 36464.58  | 1343.72 | 170.73 | 200.65 |
|             | G | 23085.09  | 1582.30 | 203.57 | 106.53 |
| NC-900      | D | 119989.54 | 1349.36 | 583.68 | 193.14 |
|             | G | 95657.97  | 1569.95 | 573.69 | 156.64 |
| Co SACs-900 | D | 24440.98  | 1349.96 | 114.30 | 200.88 |
|             | G | 18262.05  | 1570.28 | 118.52 | 144.74 |

**Table S2** The relative content of each element of the resultant catalysts from XPS analysis.

**Table S3** The fitted relative content of nitrogen species within the resultant catalysts.

| Catalyst   | Catalyst   | C (at%) | Configuration of N (%) |                      |                      |                      |
|------------|------------|---------|------------------------|----------------------|----------------------|----------------------|
|            |            |         | Oxidized-N             | Graphitic-N          | Pyrrhic-N            | Pyridinic-N          |
| CoNC-700   | CoNC-700   | 85.2    | 13.28 <sup>6.2</sup>   | 36.86 <sup>5.9</sup> | 32.71 <sup>2.7</sup> | 17.15                |
| CoNC-800   | CoNC-800   | 91.5    | 18.79 <sup>4.2</sup>   | 38.03 <sup>3.0</sup> | 30.50 <sup>1.3</sup> | 12.67                |
| CoNC-900   | CoNC-900   | 94.4    | 9.50 <sup>4.0</sup>    | 69.45 <sup>1.0</sup> | 6.98 <sup>0.6</sup>  | 14.07                |
| NC-900     | NC-900     | 91.1    | 10.34 <sup>5.3</sup>   | 38.50 <sup>3.0</sup> | 24.05                | 27.11 <sup>0.7</sup> |
| CoSACs-900 | CoSACs-900 | 86.8    | 6.08 <sup>6.6</sup>    | 52.78 <sup>5.5</sup> | 13.94 <sup>0.4</sup> | 27.21 <sup>0.8</sup> |

**Table S4** BET surface area and pore volume of the resultant catalysts.

**Table S5** EIS fitting results of the resultant catalysts.

| Catalyst   | Rs/ $\Omega$ | CPE1-T/s | CPE1-P/F | Rct/ $\Omega$ | Wo-R/ $\Omega$ | Wo-T/s  | Wo-P |
|------------|--------------|----------|----------|---------------|----------------|---------|------|
| CoNC-900   | 7.30         | 3.85E-8  | 1.55     | 0.25          | 13.28          | 6.78E-3 | 0.48 |
| NC-900     | 9.18         | 7.78E-4  | 0.72     | 1.20          | 50.37          | 0.03    | 0.49 |
| CoSACS-900 | 8.90         | 1.29E-3  | 0.98     | 0.01          | 5.13           | 0.01    | 0.50 |

  

| Catalyst    | Surface Area /m <sup>2</sup> g <sup>-1</sup> | Pore Volume /cm <sup>3</sup> g <sup>-1</sup> |
|-------------|----------------------------------------------|----------------------------------------------|
| CoNC-900    | 228.9075                                     | 0.232735                                     |
| NC-900      | 1,092.0055                                   | 0.193640                                     |
| Co SACs-900 | 890.0014                                     | 0.062090                                     |

Note: Rs: Solution resistance; CPE1: Constant phase element; Rct: Charge transfer resistance; Wo: Warburg element (open).
